# Supplementary material for: Effect of dual-doping on the thermoelectric transport properties of CaMn1−xNbx/2Tax/2O3
Source: Royal Society of Chemistry journal article supplement (doi:10.1039/c6ra06032c), 2016-01-01

## Electronic Supplementary Information

Manuscript Ref. No. RA-ART-03-2016-006032

### Title : Effect of dual-doping on thermoelectric transport properties of $\text{CaMn}_{1-x}\text{Nb}_{x/2}\text{Ta}_{x/2}\text{O}_3$

**Figure S1.** Temperature dependence of electrical resistivity of  $\text{CaMn}_{1-x}\text{Nb}_{x/2}\text{Ta}_{x/2}\text{O}_3$  with  $x = 0.06$  and  $0.08$  under heating and cooling cycles

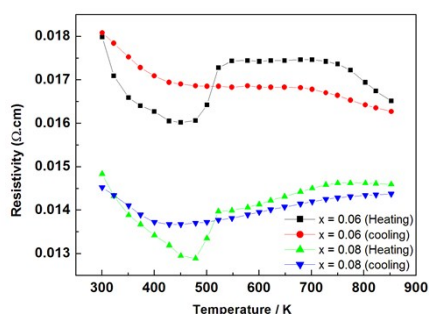

**Figure S2.** Temperature dependence of Seebeck coefficient of  $\text{CaMn}_{1-x}\text{Nb}_{x/2}\text{Ta}_{x/2}\text{O}_3$  with  $x = 0.06$  and  $0.08$  under heating and cooling cycles

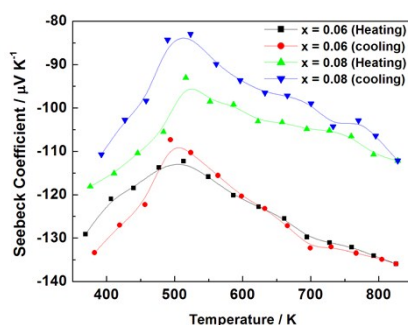

Supplement: c6ra06032c1.pdf [file c6ra06032c1.pdf]
